# Supplementary material
Source: PubMed Central journal article supplement (PMC3567615)
Supplement: NIHMS381761-supplement-1.pdf [file NIHMS381761-supplement-1.pdf]

## APPENDIX

## SUPPLEMENTARY TABLE 1

## Classification of antidepressant medications

## Selective serotonin reuptake inhibitor medications

Citalopram, fluoxetine, fluvoxamine, escitalopram, paroxetine, and sertraline

## Nonselective serotonin reuptake inhibitors

Bupropion, venlafaxine, amitriptyline, clomipramine, desipramine, doxepin, imipramine, nortriptyline, mirtazapine, maprotiline, and trazodone

Hayes. *Maternal antidepressants and adverse outcomes. Am J Obstet Gynecol* 2012.

## SUPPLEMENTARY TABLE 2

## Diagnosis codes and methods for ascertainment of adverse pregnancy outcomes

| Outcome                                        | Source                    | Notes                                                                                                                     |
|------------------------------------------------|---------------------------|---------------------------------------------------------------------------------------------------------------------------|
| Cesarean section delivery                      | Birth certificate         | Method of delivery                                                                                                        |
| Preterm delivery                               | Birth certificate         | Derived from last menstrual period                                                                                        |
|                                                | Claims checked            | <i>International Classification of Diseases</i> , 9th Revision code                                                       |
| Preterm labor/early preterm labor <sup>a</sup> | Maternal claims           | 644.2 excluding those with 654.0, 654.1, 654.5, 641.0-641.2, 250.0-250.9, 648.0, 401.0-405.0, 642.0-642.2, 657.0, 730-734 |
| Infant respiratory distress                    | Maternal or infant claims | 769                                                                                                                       |
| Convulsions                                    | Maternal or infant claims | 779.0                                                                                                                     |

<sup>a</sup> Early preterm labor was further restricted to pregnancies with 34 or less completed weeks of gestation; <sup>b</sup> Recorded during the first 14 days after infant birth.

Hayes. *Maternal antidepressants and adverse outcomes. Am J Obstet Gynecol* 2012.
